# Supplementary material for: Literature review of lupus nephritis From the Arabian Gulf region
Source: PubMed Central journal article supplement — Lupus. 2022 Nov 4;32(1):155–65. doi: 10.1177/09612033221137248 (PMC9810828; doi:10.1177/09612033221137248), 2022-11-04
Supplement: sj-pdf-1-lup-10.1177_09612033221137248.pdf [file sj-pdf-1-lup-10.1177_09612033221137248.pdf]

## Supplementary material

**Supplementary Table 1. List of the Arabian Gulf LN publications identified as eligible for inclusion**

| Author           | Year | Title                                                                                                                        | Country                                |
|------------------|------|------------------------------------------------------------------------------------------------------------------------------|----------------------------------------|
| Al Arrayed, A.   | 2004 | The spectrum of glomerular diseases in the Kingdom of Bahrain: An epidemiological study based on renal biopsy interpretation | Bahrain                                |
| Arrayed, A.A.    | 2007 | Kidney Disease in Bahrain: A Biopsy-Based Epidemiological Study                                                              | Bahrain                                |
| Farid, E.M.      | 2013 | Immunological aspects of biopsy-proven lupus nephritis in Bahraini patients with systemic lupus erythematosus                | Bahrain                                |
| Ale'ed, A. A.    | 2014 | Systemic lupus erythematosus in Arab children. Differences and similarities with different ethnicities                       | Bahrain, Kuwait, Oman and Saudi Arabia |
| Abu-Romeh, S.H.  | 1989 | Renal diseases in Kuwait. Experience with 244 renal biopsies                                                                 | Kuwait                                 |
| Gupta, R.K.      | 2001 | Intravenous immunoglobulins in lupus nephritis                                                                               | Kuwait                                 |
| Hayat, S.J.      | 2007 | Safety and efficacy of infliximab in a patient with active WHO class IV lupus nephritis                                      | Kuwait                                 |
| Nampoory, M.R.N. | 2014 | Impact of systemic lupus erythematosus on the outcome of renal transplant recipients: Single center experience               | Kuwait                                 |
| Alfadhli, S.     | 2016 | Th-17 related regulatory network in the pathogenesis of Arab patients with systemic lupus erythematosus and lupus nephritis  | Kuwait                                 |
| Alfadhli, S.     | 2016 | Genome-wide differential expression reveals candidate genes involved in the pathogenesis of lupus and lupus nephritis        | Kuwait                                 |
| Gheith, O.       | 2017 | Systemic lupus erythematosus among renal transplant recipients: Single center experience                                     | Kuwait                                 |
| El-Reshaid, K.   | 2018 | New protocols for treatment of class IV lupus nephritis with emphasis on Rituximab as the sole maintenance therapy           | Kuwait                                 |
| Al Sahow, A.     | 2019 | Rituximab use for glomerular disorders in Kuwait                                                                             | Kuwait                                 |
| Alyousef, A.     | 2020 | SAT-379 Glomerulonephritis Histopathological Pattern Change                                                                  | Kuwait                                 |
| Al Riyami, D.    | 2013 | The spectrum of glomerular diseases on renal biopsy: Data from a single tertiary center in Oman                              | Oman                                   |
| Alwahaibi, N.Y.  | 2013 | Pattern of glomerular diseases in Oman: a study based on light microscopy and immunofluorescence                             | Oman                                   |
| Al Rasbi, A.     | 2018 | Spectrum of systemic lupus erythematosus in Oman: from childhood to adulthood                                                | Oman                                   |
| Poil, A.R.       | 2013 | Pregnancy outcome in 69 pregnancies of multinational population in qatar with systemic lupus erythematosus                   | Qatar                                  |

|                        |      |                                                                                                                                         |              |
|------------------------|------|-----------------------------------------------------------------------------------------------------------------------------------------|--------------|
| Abdulla, N.            | 2016 | Lupus nephritis in Qatar                                                                                                                | Qatar        |
| Qari, F.A.             | 2002 | Clinical pattern of systemic lupus erythematosus in Western Saudi Arabia                                                                | Saudi Arabia |
| Rahman, F.Z.           | 2005 | Pregnancy outcome in lupus nephropathy                                                                                                  | Saudi Arabia |
| Alkhunaizi, A.M.       | 2007 | Pattern of renal pathology among renal biopsy specimens in Eastern Saudi Arabia                                                         | Saudi Arabia |
| Al-Rayes, H.           | 2007 | Systemic lupus erythematosus and infections: A retrospective study in Saudis                                                            | Saudi Arabia |
| Al-Zahrani, I.H.       | 2007 | Lupus nephritis. Clinicopathological correlation                                                                                        | Saudi Arabia |
| Qayyum, A.             | 2008 | Immuno-histological changes in lupus nephritis in female patients: a four-year study.                                                   | Saudi Arabia |
| Al Arfaj, A.S.         | 2009 | Lupus nephritis among 624 cases of systemic lupus erythematosus in Riyadh, Saudi Arabia                                                 | Saudi Arabia |
| Alkhfaji, D.           | 2010 | A clinicopathology correlation of lupus nephritis: A retrospective analysis of renal biopsies                                           | Saudi Arabia |
| Shawarby, M.           | 2010 | A Clinicopathologic Study of Glomerular Disease: Experience of the King Fahd Hospital of the University, Eastern Province, Saudi Arabia | Saudi Arabia |
| Durahim, H.A.          | 2011 | Predictors of mortality and end stage renal disease in Saudi patients with lupus nephritis                                              | Saudi Arabia |
| Mitwalli, A.H.         | 2011 | Comparison of high and low dose of cyclophosphamide in lupus nephritis patients: a long-term randomized controlled trial                | Saudi Arabia |
| Alsuwaida, A.          | 2012 | Strategy for second kidney biopsy in patients with lupus nephritis                                                                      | Saudi Arabia |
| Mitwalli, A.H.         | 2012 | Effects of concomitant hepatitis C virus infection in patients with underlying lupus nephritis on long-term renal outcome               | Saudi Arabia |
| Muzaffer, M.           | 2012 | Long term outcome of lupus nephritis in Saudi children                                                                                  | Saudi Arabia |
| Alsuwaida, A.O.        | 2013 | Interstitial inflammation and long-term renal outcomes in lupus nephritis                                                               | Saudi Arabia |
| Hussein, M.M.          | 2013 | Late response to rituximab in a dialysis patient with severe lupus nephritis                                                            | Saudi Arabia |
| Nawaz, Z.              | 2013 | Pattern of glomerular disease in the Saudi population: a single-center, five-year retrospective study                                   | Saudi Arabia |
| Alhomrany Mohammed, A. | 2014 | Pattern of renal disease in Saudi Arabia: Preliminary results of renal biopsy registry                                                  | Saudi Arabia |
| Alsuwaida, A.O.        | 2014 | The clinical significance of serial kidney biopsies in lupus nephritis                                                                  | Saudi Arabia |
| Alaiya, A.             | 2015 | Proteomic analysis of Class IV lupus nephritis                                                                                          | Saudi Arabia |
| Alsuwaida A.           | 2015 | Glomerular necrotic lesions and long-term outcomes among patients with proliferative lupus nephritis                                    | Saudi Arabia |
| Alhijji, A.A.          | 2017 | Lupus nephritis induction in Saudi Arabia; a multicenter retrospective study                                                            | Saudi Arabia |
| Alrowaie, F.           | 2017 | Clinical features and outcome of lupus nephritis patients with crescent in renal biopsy                                                 | Saudi Arabia |
| Al-Mayouf, S.          | 2018 | Outcome of childhood lupus nephritis in Saudi children                                                                                  | Saudi Arabia |
| Alsuwaida, A.O.        | 2018 | The long-term outcomes and histological transformation in class II lupus nephritis                                                      | Saudi Arabia |

|                 |      |                                                                                                                                                                        |              |
|-----------------|------|------------------------------------------------------------------------------------------------------------------------------------------------------------------------|--------------|
| Almalki, A.H.   | 2019 | Remission and long-term outcomes of proliferative lupus nephritis: retrospective study of 96 patients from Saudi Arabia                                                | Saudi Arabia |
| Albirdisi, M.R. | 2020 | Characteristics of lupus nephritis in Saudi lupus patients: A retrospective observational study                                                                        | Saudi Arabia |
| Al Attia, H.M.  | 1998 | Serological markers in Arabs with lupus nephritis                                                                                                                      | UAE          |
| Alalawi, F.     | 2017 | Epidemiology of end-stage renal disease in Dubai: Single-center data                                                                                                   | UAE          |
| Aldarmaki, R.   | 2018 | Cause and rate of hospitalization of lupus patients                                                                                                                    | UAE          |
| Elbadawi, F.    | 2019 | Clinicopathological characteristics as possible predictor of renal outcome in patients with active lupus nephritis following the induction of remission phase          | UAE          |
| Alkindi, F.     | 2020 | SUN-433 Spectrum of biopsy proven renal pathologies over 10 years                                                                                                      | UAE          |
| Dileep, K.S.    | 2020 | SUN-273 Patients treated with therapeutic plasma exchange - a single center experience                                                                                 | UAE          |
| Mohan, D.       | 2020 | SAT-416 Pattern of Biopsy Proven Renal Disease in Adults: Single-Centre Experience from a Tertiary Care Hospital in Dubai, UAE                                         | UAE          |
| Aldarmaki, R.   | 2021 | Hospitalization in patients with systemic lupus erythematosus at Tawam Hospital, United Arab Emirates (UAE): Rates, causes, and factors associated with length of stay | UAE          |
